# Supplementary material
Source: PubMed Central journal article supplement (PMC1347971)

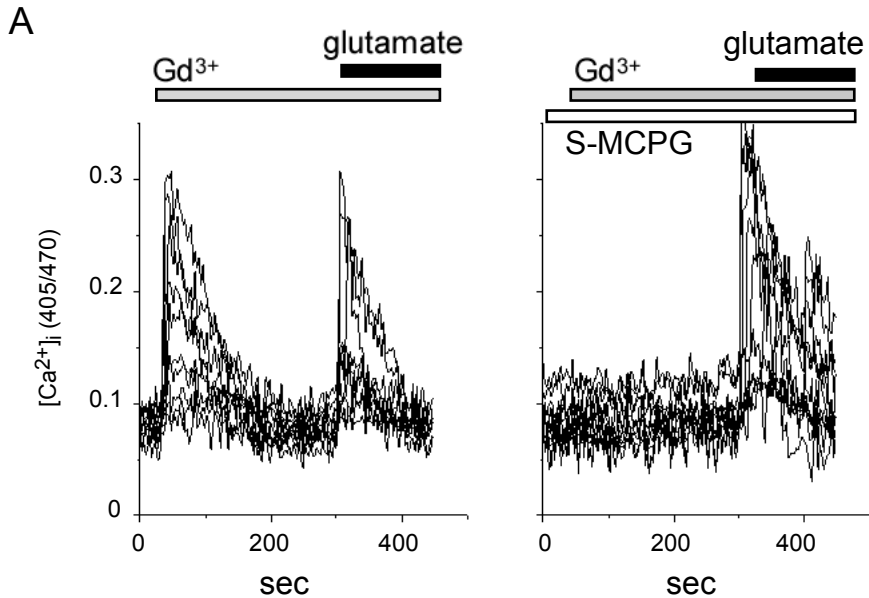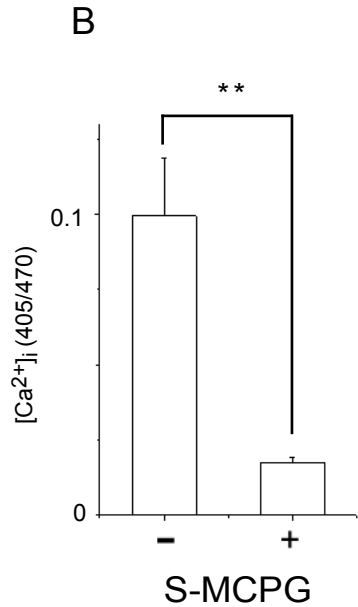

Supplement: pnas_0505925103_1.pdf [file pnas_0505925103_1.pdf]

NFRET

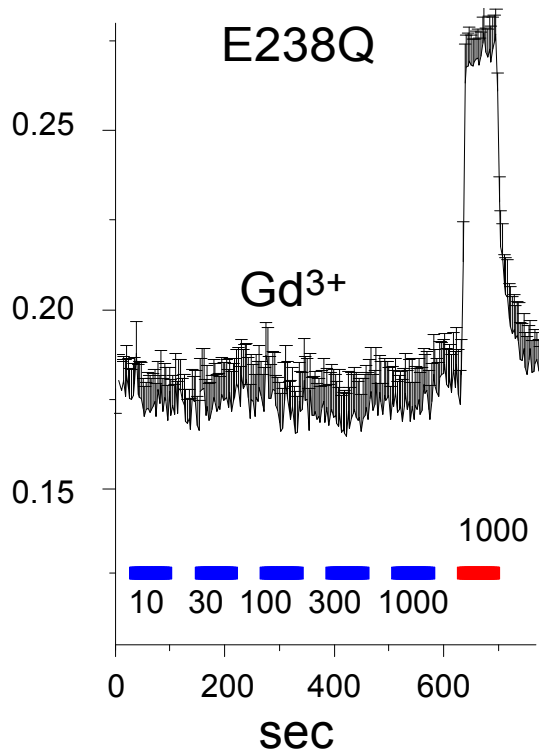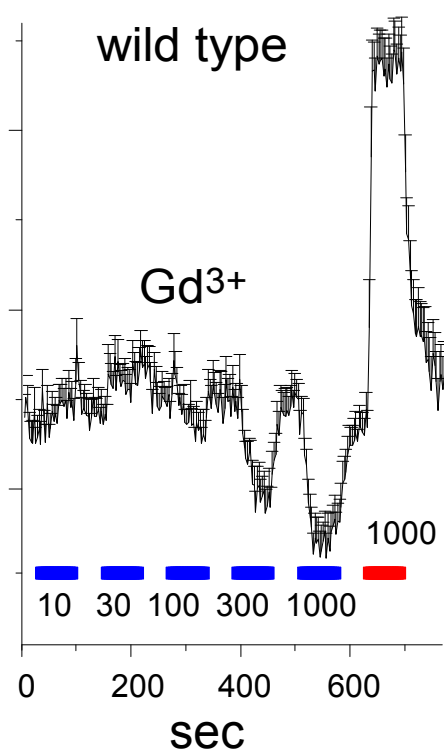

Supplement: pnas_0505925103_2.pdf [file pnas_0505925103_2.pdf]
